# Supplementary material
Source: PubMed Central journal article supplement (PMC6447416)
Supplement: MCB.00268-18-s0001.pdf [file MCB.00268-18-s0001.pdf]

## Supplemental Figure 1

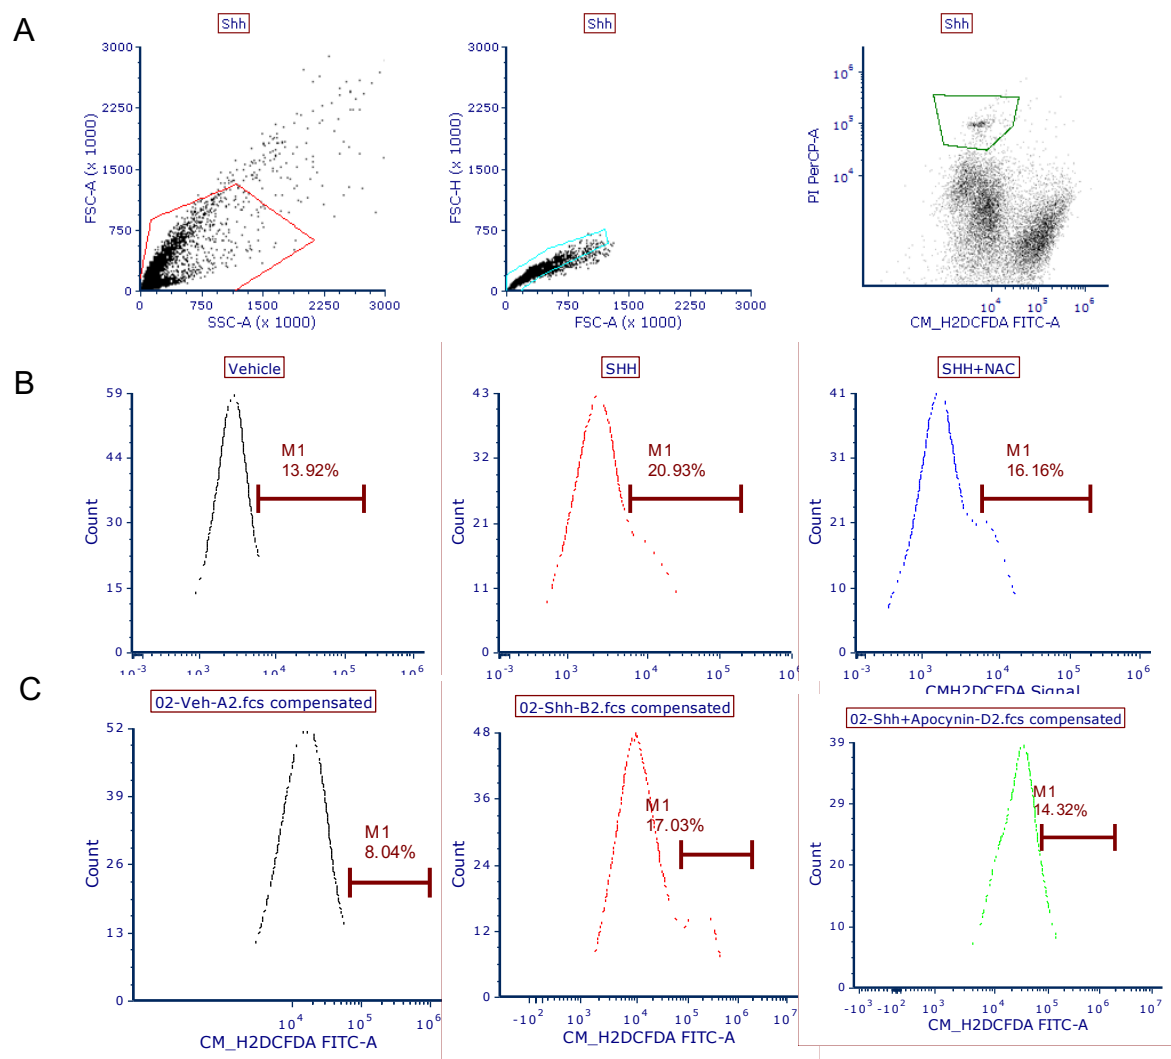

**Supplemental Figure 1. (A) Representative Gating Strategy for ROS Assay.** Stained CGNPs were loaded into the Cytotflex (Beckman Coulter) as described in materials and methods and the population first gated for (red gate) on a forward scatter/side scatter area (FSC-A X SSC-A) dot plot using the CytExpert software (Beckman Coulter). This was the parent gate for gating out doublets on a forward scatter height (FSC-H) X area (FSC-A) dot blot by gating for non-doublet events within the blue gate. The doublet gate was then the parent gate for the last dot plot featuring CM-H2DCFDA on the FITC-A channel and propidium iodide staining (PI) on the PerCP-A channel. PI positive events were excluded from this plot (green gate) and the remaining events were analyzed to generate the histograms in Figure 3. (B) Flow cytometry ROS assay shows reduced ROS in NAC-treated CGNPs. C. Flow cytometry ROS assay shows reduced ROS in apocynin-treated CGNPs.
